# Supplementary material for: Platelet Counts and Risk of Severe Retinopathy of Prematurity: A Bayesian Model-Averaged Meta-Analysis
Source: MDPI journal article supplement (doi:10.3390/children10121903), 2023-12-08
Supplement: s1 [file s1]

## Supplementary material

### Platelet Counts and Risk of Severe Retinopathy of Prematurity: A Bayesian Model-Averaged Meta-analysis

Mohamad F. Almutairi<sup>1</sup>, Silvia Gulden<sup>2</sup>, Tamara M. Hundscheid<sup>1</sup>, František Bartoš<sup>3</sup>, Giacomo Cavallaro<sup>4</sup>, and Eduardo Villamor<sup>1\*</sup>

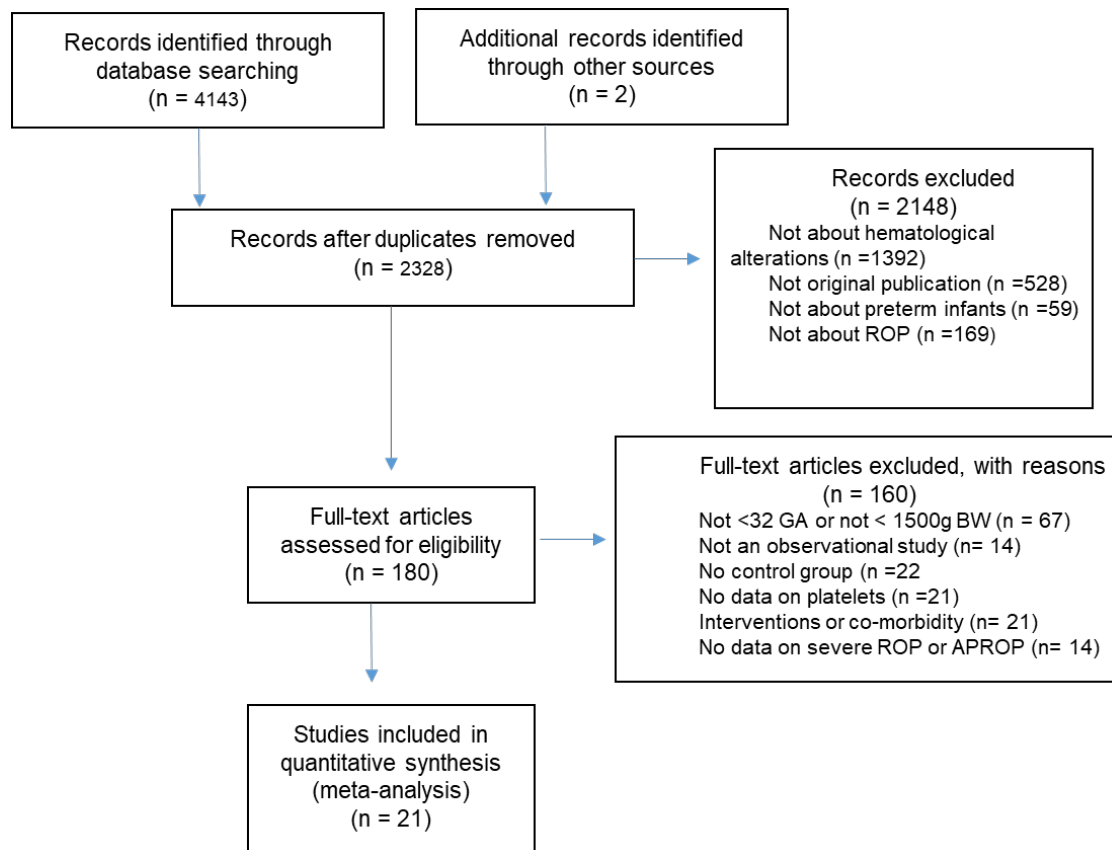

**Figure S1.** Search flow diagram

**Table S1.** Search strategy

| <b>PubMed</b> |                                                                                                                                                                                                                                                                                                                                                                                                                                                                                                                                                                                                                                                                                                            |
|---------------|------------------------------------------------------------------------------------------------------------------------------------------------------------------------------------------------------------------------------------------------------------------------------------------------------------------------------------------------------------------------------------------------------------------------------------------------------------------------------------------------------------------------------------------------------------------------------------------------------------------------------------------------------------------------------------------------------------|
| #1            | ((("Retinopathy of Prematurit*" [tiab]) OR (ROP [tiab]) OR ("Prematurity Retinopathy" [tiab]) OR ("Retrolental Fibroplasia*" [tiab]) OR ("Retinopathy of Prematurity" [Mesh]) OR ("Terry syndrome" [tiab])))                                                                                                                                                                                                                                                                                                                                                                                                                                                                                               |
| #2            | ((("premature neonate" [tiab] OR "preterm neonate" [tiab] OR "premature infant*" [tiab]) OR ("preterm infant*" [tiab]) OR ("extremely premature infant*" [tiab]) OR ("extremely preterm infant*" [tiab]) OR ("Infant, Premature" [Mesh]) OR ("low birth weight infant*" [tiab]) OR ("low birth weight*" [tiab]) OR ("very low birth weight infant*" [tiab]) OR ("very low birth weight*" [tiab]) OR ("Extremely Low Birth Weight infant*" [tiab]) OR ("Extremely Low Birth Weight*" [tiab]) OR ("Infant, Low Birth Weight" [Mesh]) OR ("Decreased gestational age" [tiab]) OR ("premature gestation" [tiab]) OR ("prematurity" [tiab]) OR ("preterm" [tiab]) OR ("premature" [tiab])))                     |
| #3            | ((("risk factor*" [tiab]) OR ("platelet count" [MeSH]) OR ("Platelet Count" [tiab]) OR ("platelet transfusion" [MeSH]) OR ("mean platelet volume" [MeSH]) OR ("Mean Platelet Volume" [tiab]) OR ("Platelet Transfusion" [tiab]) OR ("thrombocytopenia" [MeSH]) OR ("Thrombocytopenia" [tiab])))                                                                                                                                                                                                                                                                                                                                                                                                            |
| #4            | #1 AND #2 AND #3                                                                                                                                                                                                                                                                                                                                                                                                                                                                                                                                                                                                                                                                                           |
| <b>EMBASE</b> |                                                                                                                                                                                                                                                                                                                                                                                                                                                                                                                                                                                                                                                                                                            |
| #1            | exp retinopathy of prematurity/ or (retinopathy of prematurity or retrolental dysplasia or retrolental fibrosis or retrolenticular fibroplasia).ab,ti,kf.                                                                                                                                                                                                                                                                                                                                                                                                                                                                                                                                                  |
| #2            | exp prematurity/ or extremely premature infant*.ab,kf,ti. or infant*, extremely premature.ab,kf,ti. or (preterm* OR pre-term* OR prematur* OR pre-matur*).ti,ab,kf. or infant*, premature.ab,kf,ti. or infant*, premature, disease*.ab,kf,ti. or neonate*, premature.ab,kf,ti. or pre-mature infant*.ab,kf,ti. or pre-term baby*.ab,kf,ti. or pre-term child*.ab,kf,ti. or pre-term infant*.ab,kf,ti. or pre-term neonate*.ab,kf,ti. or pre-term newborn*.ab,kf,ti. or premature.ab,kf,ti. or premature baby*.ab,kf,ti. or premature birth*.ab,kf,ti. or premature child*.ab,kf,ti. or premature childbirth*.ab,kf,ti. or premature infant*.ab,kf,ti. or premature infant* disease*.ab,kf,ti. or premature |

|                       |                                                                                                                                                                                                                                                                                                                                                                                                                                                                                                                                                                                                                                                                                                                                                                                                                                                                                                                                                                                                                                                                                                                                                                                                                                                                                                                                                                                                                                                                                                                                                                                                                       |
|-----------------------|-----------------------------------------------------------------------------------------------------------------------------------------------------------------------------------------------------------------------------------------------------------------------------------------------------------------------------------------------------------------------------------------------------------------------------------------------------------------------------------------------------------------------------------------------------------------------------------------------------------------------------------------------------------------------------------------------------------------------------------------------------------------------------------------------------------------------------------------------------------------------------------------------------------------------------------------------------------------------------------------------------------------------------------------------------------------------------------------------------------------------------------------------------------------------------------------------------------------------------------------------------------------------------------------------------------------------------------------------------------------------------------------------------------------------------------------------------------------------------------------------------------------------------------------------------------------------------------------------------------------------|
|                       | <p>neonate*.ab,kf,ti. or premature newborn*.ab,kf,ti. or premature syndrome*.ab,kf,ti. or prematuritas.ab,kf,ti. or preterm baby*.ab,kf,ti. or preterm child*.ab,kf,ti. or preterm infant*.ab,kf,ti. or preterm neonate*.ab,kf,ti. or preterm newborn*.ab,kf,ti. or exp anemia of prematurity/ or anaemia of prematurity.ab,kf,ti. or premature anaemia.ab,kf,ti. or premature anemia.ab,kf,ti. or prematurity anaemia.ab,kf,ti. or prematurity anemia.ab,kf,ti. or newborn anemia.ab,kf,ti.</p>                                                                                                                                                                                                                                                                                                                                                                                                                                                                                                                                                                                                                                                                                                                                                                                                                                                                                                                                                                                                                                                                                                                      |
| #3                    | <p>exp risk factor/ or risk factor*.ab,kf,ti. or exp blood transfusion/ or exp erythrocyte transfusion/ or normocyte transfusion.ab,kf,ti. or red blood cell transfusion.ab,kf,ti. or transfusion*, erythrocyte*.ab,kf,ti. or exp erythrocyte count/ or counting, erythrocyte.ab,kf,ti. or erythrocyte counting.ab,kf,ti. or erythrocyte number*.ab,kf,ti. or normocyte count.ab,kf,ti. or normocyte number.ab,kf,ti. or RBC count.ab,kf,ti. or red blood cell count.ab,kf,ti. or red blood cell number*.ab,kf,ti. or red cell count.ab,kf,ti. or red cell number*.ab,kf,ti. or exp iron deficiency anemia/ or anaemia, iron deficiency.ab,kf,ti. or anaemia, microcytic hypochromic.ab,kf,ti. or iron deficient anaemia.ab,kf,ti. or iron deficiency anaemia.ab,kf,ti. or exp platelet count/ or blood platelet count.ab,kf,ti. or count, blood platelet*.ab,kf,ti. or count, thrombocytic.ab,kf,ti. or platelet counting.ab,kf,ti. or platelet number*.ab,kf,ti. or exp thrombocytopenia/ or thrombocyte* count.ab,kf,ti. or thrombocyte counting.ab,kf,ti. or thrombocyte number*.ab,kf,ti. or thrombocytic count.ab,kf,ti. or thrombocyte/ or blood platelet.ab,kf,ti. or blood platelet*.ab,kf,ti. or platelet*.ab,kf,ti. or exp mean platelet volume/ or average platelet volume.ab,kf,ti. or average thrombocyte volume.ab,kf,ti. or mean thrombocyte volume.ab,kf,ti. or thrombocyte transfusion/ or blood platelet transfusion*.ab,kf,ti. or platelet concentrate transfusion*.ab,kf,ti. or platelet transfusion*.ab,kf,ti. or thrombocytic transfusion.ab,kf,ti. or transfusion, thrombocyte*.ab,kf,ti.</p> |
| #4                    | #1 AND #2 AND #3                                                                                                                                                                                                                                                                                                                                                                                                                                                                                                                                                                                                                                                                                                                                                                                                                                                                                                                                                                                                                                                                                                                                                                                                                                                                                                                                                                                                                                                                                                                                                                                                      |
| <b>Web of Science</b> |                                                                                                                                                                                                                                                                                                                                                                                                                                                                                                                                                                                                                                                                                                                                                                                                                                                                                                                                                                                                                                                                                                                                                                                                                                                                                                                                                                                                                                                                                                                                                                                                                       |
| #2                    | <p>((((TI="premature neonate" OR AB="premature neonate") OR (TI="preterm neonate" OR AB="preterm neonate") OR (TI="premature infant*" OR AB="premature infant*")) OR ((TI="preterm infant*" OR AB="preterm infant*")) OR ((TI="extremely premature infant*" OR AB="extremely premature infant*")) OR ((TI="extremely preterm infant*" OR</p>                                                                                                                                                                                                                                                                                                                                                                                                                                                                                                                                                                                                                                                                                                                                                                                                                                                                                                                                                                                                                                                                                                                                                                                                                                                                          |

|    |                                                                                                                                                                                                                                                                                                                                                                                                                                                                                                                                                                                                                                                                                                                                                                                                                                                                                                                                                                                                                                          |
|----|------------------------------------------------------------------------------------------------------------------------------------------------------------------------------------------------------------------------------------------------------------------------------------------------------------------------------------------------------------------------------------------------------------------------------------------------------------------------------------------------------------------------------------------------------------------------------------------------------------------------------------------------------------------------------------------------------------------------------------------------------------------------------------------------------------------------------------------------------------------------------------------------------------------------------------------------------------------------------------------------------------------------------------------|
|    | <p>AB="extremely preterm infant*")) OR<br/> (ALL="Infant, Premature") OR ((TI="low birth weight infant*" OR AB="low birth weight infant*")) OR ((TI="low birth weight*" OR AB="low birth weight*")) OR ((TI="very low birth weight infant*" OR AB="very low birth weight infant*")) OR ((TI="very low birth weight*" OR AB="very low birth weight*")) OR ((TI="Extremely Low Birth Weight infant*" OR AB="Extremely Low Birth Weight infant*")) OR ((TI="Extremely Low Birth Weight*" OR AB="Extremely Low Birth Weight*")) OR (ALL="Infant, Low Birth Weight") OR ((TI="Decreased gestational age" OR AB="Decreased gestational age")) OR ((TI="premature gestation" OR AB="premature gestation")) OR ((TI=prematurity OR AB=prematurity)) OR ((TI=preterm OR AB=preterm)) OR ((TI=premature OR AB=premature)))</p>                                                                                                                                                                                                                     |
| #3 | <p>((TI="risk factor*" OR AB="risk factor*")) OR (ALL="Blood Transfusion") OR ((TI="blood transfusion*" OR AB="blood transfusion*")) OR ((TI="blood component transfusion*" OR AB="blood component transfusion*")) OR ((TI="Erythrocyte Transfusion*" OR AB="Erythrocyte Transfusion*")) OR ((TI="red blood cell transfusion*" OR AB="red blood cell transfusion*")) OR ((TI="red cell transfusion*" OR AB="red cell transfusion*")) OR ((TI="red blood cell count" OR AB="red blood cell count")) OR ((TI="RBC count" OR AB="RBC count")) OR (ALL="anemia, iron-deficiency") OR (ALL=iron) OR ((TI="iron deficiency*" OR AB="iron deficiency*")) OR ((TI=anemia OR AB=anemia)) OR (ALL="platelet count") OR ((TI="Platelet Count" OR AB="Platelet Count")) OR (ALL="platelet transfusion") OR (ALL="mean platelet volume") OR ((TI="Mean Platelet Volume" OR AB="Mean Platelet Volume")) OR ((TI="Platelet Transfusion" OR AB="Platelet Transfusion")) OR (ALL=thrombocytopenia) OR ((TI=Thrombocytopenia OR AB=Thrombocytopenia)))</p> |
| #4 | #1 AND #2 AND #3                                                                                                                                                                                                                                                                                                                                                                                                                                                                                                                                                                                                                                                                                                                                                                                                                                                                                                                                                                                                                         |

**Table S2.** Characteristics of the included studies and risk of bias.

| First author, year       | Country     | Design | Prospective ? | Centers | n   | Mean or median GA | NOS score |
|--------------------------|-------------|--------|---------------|---------|-----|-------------------|-----------|
| Abdel Salaam Gomaa, 2022 | Egypt       | Ca-Co  | No            | 1       | 50  | 31.2              | 7         |
| Akyuz Unsal, 2020        | Turkey      | Ca-Co  | No            | 1       | 36  | 28,9              | 8         |
| Cakir, 2018              | Sweden      | Cohort | No            | 2       | 202 | <27               | 7         |
| Cekmez, 2013             | Turkey      | Cohort | Yes           | 1       | 171 | 30.5              |           |
| Celik, 2021              | Turkey      | Ca-Co  | No            | 1       | 46  | 26.8              | 7         |
| Choreziak, 2022          | Poland      | Cohort | No            | 1       | 163 | 26.6              | 7         |
| Fevereiro-Martins, 2023  | Portugal    | Cohort | Yes           | 8       | 455 | 29.6              | 8         |
| Hellgren, 2021           | Sweden      | Cohort | No            | 1       | 78  | 25.2              | 7         |
| Hengartner, 2020         | Switzerland | Ca-Co  | No            | 9       | 356 | 25,5              | 8         |
| Jensen, 2011             | USA         | Ca-Co  | No            | 1       | 182 | 25.6              | 8         |
| Korkmaz, 2018            | Turkey      | Ca-Co  | No            | 1       | 146 | 27.5              | 8         |
| Lim, 2021                | Malaysia    | Ca-Co  | No            | 1       | 93  | 27.6              | 8         |
| Lundgren, 2017           | Sweden      | Ca-Co  | No            | 1       | 18  | 24.4              | 8         |
| Okur, 2016               | Turkey      | Cohort | No            | 1       | 330 | 28                | 7         |
| Panchal, 2020            | Australia   | Ca-Co  | No            | 1       | 227 | 25.1              | ?         |
| Parrozzani, 2021         | Italy       | Cohort | No            | 1       | 529 | 29.0              | 8         |
| Sahinoglu-Keskek, 2020   | Turkey      | Cohort | No            | 1       | 137 | 30.2              | 7         |
| Sancak, 2019             | Turkey      | Ca-Co  | No            | 1       | 162 | 27.6              | 8         |
| Tao, 2015                | China       | Ca-Co  | No            | 1       | 148 | 29.9              | 7         |
| Vinekar, 2010            | India       | Ca-Co  | No            | 1       | 31  | 29.4              | 8         |
| Yuksul 2014              | Turkey      | Ca-Co  | No            | 1       | 65  | 28.9              | 7         |
